# Supplementary material for: Chronic Vestibular Hypofunction Is Associated with Impaired Sleep: Results from the DizzyReg Patient Registry
Source: MDPI journal article supplement (doi:10.3390/jcm12185903), 2023-09-11
Supplement: s1 [file s1]

# Chronic vestibular hypofunction is associated with impaired sleep: Results from the DizzyReg patient registry

Benedict Katzenberger <sup>1,2,\*</sup>, Fiona Brosch <sup>1,2</sup>, Stéphane Besnard <sup>3,4</sup> and Eva Grill <sup>1,5</sup>

<sup>1</sup> Institute for Medical Information Processing, Biometry and Epidemiology (IBE), Faculty of Medicine, LMU Munich, 81377 Munich, Germany

<sup>2</sup> Pettenkofer School of Public Health, 81377 Munich, Germany

<sup>3</sup> Laboratory of Cognitive Neurosciences, UMR7291, Team Pathophysiology and Therapy of Vestibular Disorders, Aix Marseille University, Centre National de la Recherche Scientifique (CNRS), 13331 Marseille, France

<sup>4</sup> Research Group on Vestibular Pathophysiology, Centre National de la Recherche Scientifique (CNRS), Unit GDR2074, 13331 Marseille, France

<sup>5</sup> German Center for Vertigo and Balance Disorders, LMU University Hospital, LMU Munich, 81377 Munich, Germany

\* Correspondence: benedict.katzenberger@med.uni-muenchen.de

**Supplemental Table S2 Detailed variable list**

| Variable                                | Label                                                                   | Type                     | Categories and Transformation                                                                                     |
|-----------------------------------------|-------------------------------------------------------------------------|--------------------------|-------------------------------------------------------------------------------------------------------------------|
| <b>Sociodemographic characteristics</b> |                                                                         |                          |                                                                                                                   |
| age                                     | Age in years                                                            | Numeric                  |                                                                                                                   |
| gender                                  | Patients' gender                                                        | Categorical              | 1, Male<br>2, Female                                                                                              |
| period_cat                              | Duration of vertigo and dizziness symptoms                              | Categorical              | 0, Two years or less<br>1, More than 2 years                                                                      |
| smoking_status                          | Smoking status                                                          | Categorical, Transformed | 1 ("Current"), nicotine = 1<br>2 ("Former"), nicotine_yesno = 1 & nicotine = 0<br>3 ("Never"), nicotine_yesno = 0 |
| nicotine                                | Do you currently smoke?                                                 | Categorical              | 0, No<br>1, Yes                                                                                                   |
| nicotine_yesno                          | Did you ever smoke?                                                     | Categorical              | 0, No<br>1, Yes                                                                                                   |
| alcohol                                 | Did you consume at least one alcoholic beverage within the last 7 days? | Categorical              | 0, No<br>1, Yes                                                                                                   |
| alcohol_amount                          | Average amount of alcohol consumed in grams per day                     | Numeric                  |                                                                                                                   |
| morbidity                               | Multimorbidity (>= 2 comorbidities present)                             | Categorical              | 0, No<br>1, Yes                                                                                                   |
| <b>Sleep difficulty sub-scores</b>      |                                                                         |                          |                                                                                                                   |
| PSQI_TOTAL                              | Global sleep quality, index                                             | Numeric                  |                                                                                                                   |
| PSQI_TOTAL_bin                          | Global sleep quality                                                    | Categorical, Transformed | 0 ("Good sleepers"), PSQI_TOTAL <= 5<br>1 ("Poor sleepers"), PSQI_TOTAL > 5                                       |
| PSQI_SLPQUAL_bin                        | Problems with sleep quality                                             | Categorical, Transformed | 0 ("No problems"), psqi_07 = 0<br>1 ("Present problems"), psqi_07 > 0                                             |
| PSQI_LATEN_bin                          | Problems with sleep latency                                             | Categorical, Transformed | 0 ("No problems"), psqi_02 <=15.0 & psqi_06a =0<br>1 ("Present problems"), psqi_02 >15.0   psqi_06a >0            |
| PSQI_MEDS_bin                           | Medication needed to fall asleep                                        | Categorical, Transformed | 0 ("No meds taken"), psqi_08 = 0<br>1 ("Meds taken"), psqi_08 > 0                                                 |

Continued on page 2

**Supplemental Table S2** Detailed variable list (continued)

| Variable                            | Label                                                                                                                                              | Type                        | Categories and Transformation                                                                                             |
|-------------------------------------|----------------------------------------------------------------------------------------------------------------------------------------------------|-----------------------------|---------------------------------------------------------------------------------------------------------------------------|
| <b>Sleep difficulty sub-scores</b>  |                                                                                                                                                    |                             |                                                                                                                           |
| PSQI_DURAT_bin                      | Sleep duration                                                                                                                                     | Categorical,<br>Transformed | 0 ("At least 7 hours"), $psqi\_04 \geq 7$<br>1 ("Less than 7 hours"), $psqi\_04 < 7$                                      |
| TMP_HSE                             | Ratio of time actually slept<br>and total time spend in bed                                                                                        | Numeric,<br>Transformed     | $(psqi\_04 / \text{diff}(psqi\_01, psqi\_03)) * 100$                                                                      |
| PSQI_HSE_bin                        | Sleep efficiency,                                                                                                                                  | Categorical,<br>Transformed | 0 ("No problems"), $TMP\_HSE \geq 85$<br>1 (Present problems"), $TMP\_HSE * 100 < 85$                                     |
| PSQI_DISTB_bin                      | Sleep disturbance                                                                                                                                  | Categorical,<br>Transformed | 0 ("No disturbance"), all $psqi\_06a$ to $psqi\_06j = 0$<br>1 ("Any disturbance"), any $psqi\_06a$ to $psqi\_06j > 0$     |
| PSQI_DAYDYS_bin                     | Day disfunction due to<br>sleepiness                                                                                                               | Categorical,<br>Transformed | 0 ("No problems"), $psqi\_09 = 0$ & $psqi\_10 = 0$<br>1 ("Present problems"), $psqi\_09 > 0 \vee psqi\_10 > 0$            |
| <b>Sleep difficulty - questions</b> |                                                                                                                                                    |                             |                                                                                                                           |
| psqi_01                             | What time did you usually<br>go to bed in the evening<br>during the last four weeks?                                                               | Numeric                     |                                                                                                                           |
| psqi_02                             | In the last four weeks, how<br>long did it usually take you<br>to fall asleep (in minutes)?                                                        | Numeric                     |                                                                                                                           |
| psqi_03                             | What time did you usually<br>get up during the last four<br>weeks?                                                                                 | Numeric                     |                                                                                                                           |
| psqi_04                             | How many hours per night<br>did you actually sleep in<br>the last four weeks?                                                                      | Numeric                     |                                                                                                                           |
| psqi_05                             | How many hours per day<br>spent napping?                                                                                                           | Numeric                     |                                                                                                                           |
| psqi_06a                            | How many times in the last<br>four weeks have you slept<br>poorly because you could<br>not fall asleep within 30<br>min?                           | Categorical                 | 0, Not during the past four weeks<br>1, Less than once a week<br>2, Once or twice a week<br>3, Three or more times a week |
| psqi_06b                            | How many times in the last<br>four weeks have you slept<br>poorly because you woke<br>up in the middle of the<br>night or early in the<br>morning? | Categorical                 | 0, Not during the past four weeks<br>1, Less than once a week<br>2, Once or twice a week<br>3, Three or more times a week |
| psqi_06c                            | How many times in the last<br>four weeks have you slept<br>poorly because you had to<br>get up to go to the<br>bathroom?                           | Categorical                 | 0, Not during the past four weeks<br>1, Less than once a week<br>2, Once or twice a week<br>3, Three or more times a week |

Continued on page 3

**Supplemental Table S2** Detailed variable list (continued)

| Variable                            | Label                                                                                                                                     | Type        | Categories and Transformation                                                                                             |
|-------------------------------------|-------------------------------------------------------------------------------------------------------------------------------------------|-------------|---------------------------------------------------------------------------------------------------------------------------|
| <b>Sleep difficulty - questions</b> |                                                                                                                                           |             |                                                                                                                           |
| psqi_06d                            | How many times in the last four weeks have you slept poorly because you had trouble breathing?                                            | Categorical | 0, Not during the past four weeks<br>1, Less than once a week<br>2, Once or twice a week<br>3, Three or more times a week |
| psqi_06e                            | How many times in the last four weeks have you slept poorly because you had to cough or snored loudly?                                    | Categorical | 0, Not during the past four weeks<br>1, Less than once a week<br>2, Once or twice a week<br>3, Three or more times a week |
| psqi_06f                            | How many times in the last four weeks have you slept poorly because you were too cold?                                                    | Categorical | 0, Not during the past four weeks<br>1, Less than once a week<br>2, Once or twice a week<br>3, Three or more times a week |
| psqi_06g                            | How many times in the last four weeks have you slept poorly because you were too warm?                                                    | Categorical | 0, Not during the past four weeks<br>1, Less than once a week<br>2, Once or twice a week<br>3, Three or more times a week |
| psqi_06h                            | How many times in the last four weeks have you slept poorly because you had bad dreams?                                                   | Categorical | 0, Not during the past four weeks<br>1, Less than once a week<br>2, Once or twice a week<br>3, Three or more times a week |
| psqi_06ii                           | How many times in the last four weeks have you slept poorly because you had pain?                                                         | Categorical | 0, Not during the past four weeks<br>1, Less than once a week<br>2, Once or twice a week<br>3, Three or more times a week |
| psqi_06j                            | How many times in the last four weeks have you slept poorly because for other reasons?                                                    | Categorical | 0, Not during the past four weeks<br>1, Less than once a week<br>2, Once or twice a week<br>3, Three or more times a week |
| psqi_07                             | Overall, how would you rate your sleep quality over the past four weeks?                                                                  | Categorical | 0, Very good<br>1, Fairly good<br>2, Fairly bad<br>3, Very bad                                                            |
| psqi_08                             | During the last four weeks, how often have you taken medicine (prescribed or “over the counter”) to help you sleep?                       | Categorical | 0, Not during the past four weeks<br>1, Less than once a week<br>2, Once or twice a week<br>3, Three or more times a week |
| psqi_09                             | During the last four weeks, how often did you have difficulty staying awake, for example, while driving, eating, or during social events? | Categorical | 0, Not during the past four weeks<br>1, Less than once a week<br>2, Once or twice a week<br>3, Three or more times a week |
| psqi_10                             | During the last four weeks, have you had any problems doing the usual daily tasks with enough drive?                                      | Categorical | 0, No problems<br>1, Few problems<br>2, Some problems<br>3, Major problems                                                |
