# Supplementary material for: Chronic Vestibular Hypofunction Is Associated with Impaired Sleep: Results from the DizzyReg Patient Registry
Source: MDPI journal article supplement (doi:10.3390/jcm12185903), 2023-09-11
Supplement: s1 [file s1]

# Chronic vestibular hypofunction is associated with impaired sleep: Results from the DizzyReg patient registry

Benedict Katzenberger <sup>1,2,\*</sup>, Fiona Brosch <sup>1,2</sup>, Stéphane Besnard <sup>3,4</sup> and Eva Grill <sup>1,5</sup>

<sup>1</sup> Institute for Medical Information Processing, Biometry and Epidemiology (IBE), Faculty of Medicine, LMU Munich, 81377 Munich, Germany

<sup>2</sup> Pettenkofer School of Public Health, 81377 Munich, Germany

<sup>3</sup> Laboratory of Cognitive Neurosciences, UMR7291, Team Pathophysiology and Therapy of Vestibular Disorders, Aix Marseille University, Centre National de la Recherche Scientifique (CNRS), 13331 Marseille, France

<sup>4</sup> Research Group on Vestibular Pathophysiology, Centre National de la Recherche Scientifique (CNRS), Unit GDR2074, 13331 Marseille, France

<sup>5</sup> German Center for Vertigo and Balance Disorders, LMU University Hospital, LMU Munich, 81377 Munich, Germany

\* Correspondence: benedict.katzenberger@med.uni-muenchen.de

## Supplemental Table S1 Assessment of comorbidities in the DizzyReg patient registry

- Asthma
- Chronic obstructive pulmonary disease or emphysema
- Chronic bronchitis
- Neurological disease (multiple sclerosis, epilepsy)
- Liver disease (e.g. cirrhosis)
- Cardiac insufficiency
- Angina pectoris, coronary sclerosis
- Cardiac arrhythmia
- Hay fever
- Kidney disease
- Inflammatory joint disease
- Hypertension
